# Supplementary material for: Effects of respiratory physiotherapy interventions on pulmonary mechanics of newborns: a protocol for a systematic review
Source: HighWire-hosted journal article supplement (doi:10.1136/bmjopen-2022-062910), 2022-08-01
Supplement: bmjopen-2022-062910supp001_data_supplement.pdf [file bmjopen-2022-062910supp001_data_supplement.pdf]

## SUPPLEMENTARY FILE

## SEARCH STRATEGY

| <i>QUESTION OR PROBLEM (PICO)</i> | <i>DESCRIPTION</i>                         | <i>MERSH TERMS</i>                                                           | <i>ENTRY TERMS E KEYWORDS</i>                                                                                                                                                                                                                                                                                                                                                                                                                                                                                                                                                                                                                                              |
|-----------------------------------|--------------------------------------------|------------------------------------------------------------------------------|----------------------------------------------------------------------------------------------------------------------------------------------------------------------------------------------------------------------------------------------------------------------------------------------------------------------------------------------------------------------------------------------------------------------------------------------------------------------------------------------------------------------------------------------------------------------------------------------------------------------------------------------------------------------------|
| <b>P - POPULATION</b>             | Newborns                                   | Newborn                                                                      | Newborn, Newborns, Newborn Infant, Newborn Infants, Neonate, Neonates                                                                                                                                                                                                                                                                                                                                                                                                                                                                                                                                                                                                      |
| <b>I - INTERVENTION</b>           | Not conventional respiratory physiotherapy | Physical Therapy Modalities, Physical Therapy Specialty, Respiratory Therapy | Physical Therapy Modality, Physical Therapy Modalities, Physiotherapy (Techniques), Physiotherapies (Techniques), Physical Therapy Techniques, Physical Therapy Technique, Group Physiotherapy, Group Physiotherapies, Physical Therapy, Physical Therapies, Physical Therapy Specialty, Physiotherapy Specialty, Respiratory Therapy, Respiratory Therapies, Chest Physical Therapy, Conventional Chest Physical Therapy, Chest Physiotherapy, Physiotherapy Respiratory, Physiotherapy, Autogenic Drainage, Expiratory Flow Increase Technique, Prolonged Slow Expiratory Maneuver, Technique of Re-educating Thoracic and Abdominal, Chest Percussion, Shaking, Tapping |
| <b>C - CONTROL</b>                | Conventional respiratory physiotherapy     |                                                                              |                                                                                                                                                                                                                                                                                                                                                                                                                                                                                                                                                                                                                                                                            |

|                    |                                                                                                   |                                                                                             |                                                                                                                                                                                                                                                                                                                                                                                                                                                                                                                                                                                          |
|--------------------|---------------------------------------------------------------------------------------------------|---------------------------------------------------------------------------------------------|------------------------------------------------------------------------------------------------------------------------------------------------------------------------------------------------------------------------------------------------------------------------------------------------------------------------------------------------------------------------------------------------------------------------------------------------------------------------------------------------------------------------------------------------------------------------------------------|
| <b>O - OUTCOME</b> | Respiratory Mechanics, Lung Volumes and Capacities, Secretion, Pain, Heart Rate, Respiratory Rate | Respiratory Mechanics, Lung Volume Measurements, Sputum, Pain, Heart Rate, Respiratory Rate | Respiratory Mechanic, Respiratory Mechanics, Breathing Mechanics, Breathing Mechanic, Lung Volume Measurement, Lung Volumes, Lung Volume, Lung Capacities, Lung Capacity, Sputum, Sputums, Induced Sputum, Induced Sputums, Pain, Heart Rate, Heart Rates, Cardiac Rate, Cardiac Rates, Pulse Rate, Pulse Rates, Heartbeat, Heartbeats, Cardiac Chronotropy, Cardiac Chronotropism, Heart Rate Control, Respiratory Rate, Respiratory Rates, Respiration Rate, Respiration Rates<br><br>Lung Mechanic, Lung Mechanic, Pulmonary Mechanic, Pulmonary Mechanics, Thoracoabdominal Mobility |
|--------------------|---------------------------------------------------------------------------------------------------|---------------------------------------------------------------------------------------------|------------------------------------------------------------------------------------------------------------------------------------------------------------------------------------------------------------------------------------------------------------------------------------------------------------------------------------------------------------------------------------------------------------------------------------------------------------------------------------------------------------------------------------------------------------------------------------------|

**BASE STRATEGY:**

(Newborn OR Newborns OR Newborn Infant OR Newborn Infants OR Neonate OR Neonates) AND (Physical Therapy Modality OR Physical Therapy Modalities OR Physiotherapy (Techniques) OR Physiotherapies (Techniques) OR Physical Therapy Techniques OR Physical Therapy Technique OR Group Physiotherapy OR Group Physiotherapies OR Physical Therapy OR Physical Therapies OR Physical Therapy Specialty OR Physiotherapy Specialty OR Respiratory Therapy OR Respiratory Therapies OR Chest Physical Therapy OR Conventional Chest Physical Therapy OR Chest Physiotherapy OR Physiotherapy Respiratory OR Physiotherapy OR Autogenic Drainage OR Expiratory Flow Increase Technique OR Prolonged Slow Expiratory Maneuver OR Technique of Re-educating Thoracic and Abdominal OR Chest Percussion OR Shaking OR Tapping) AND (Respiratory Mechanic OR Respiratory Mechanics OR Breathing Mechanics OR Breathing Mechanic OR Lung Volume Measurement OR Lung Volumes OR Lung Volume OR Lung Capacities OR Lung Capacity OR Sputum OR Sputums OR Induced Sputum OR Induced Sputums OR Pain OR Heart Rate OR Heart Rates OR Cardiac Rate OR Cardiac Rates OR Pulse Rate OR Pulse Rates OR Heartbeat

OR Heartbeats OR Cardiac Chronotropy OR Cardiac Chronotropism OR Heart Rate Control OR Respiratory Rate OR Respiratory Rates OR Respiration Rate OR Respiration Rates OR Lung Mechanic OR Lung Mechanic OR Pulmonary Mechanic OR Pulmonary Mechanics OR Thoracoabdominal Mobility)

## STRATEGIES IN DATABASES

### PUBMED

(Newborn OR Newborns OR Newborn Infant OR Newborn Infants OR Neonate OR Neonates) AND (Physical Therapy Modality OR Physical Therapy Modalities OR Physiotherapy (Techniques) OR Physiotherapies (Techniques) OR Physical Therapy Techniques OR Physical Therapy Technique OR Group Physiotherapy OR Group Physiotherapies OR Physical Therapy OR Physical Therapies OR Physical Therapy Specialty OR Physiotherapy Specialty OR Respiratory Therapy OR Respiratory Therapies OR Chest Physical Therapy OR Conventional Chest Physical Therapy OR Chest Physiotherapy OR Physiotherapy Respiratory OR Physiotherapy OR Autogenic Drainage OR Expiratory Flow Increase Technique OR Prolonged Slow Expiratory Maneuver OR Technique of Re-educating Thoracic and Abdominal OR Chest Percussion OR Shaking OR Tapping) AND (Respiratory Mechanic OR Respiratory Mechanics OR Breathing Mechanics OR Breathing Mechanic OR Lung Volume Measurement OR Lung Volumes OR Lung Volume OR Lung Capacities OR Lung Capacity OR Sputum OR Sputums OR Induced Sputum OR Induced Sputums OR Pain OR Heart Rate OR Heart Rates OR Cardiac Rate OR Cardiac Rates OR Pulse Rate OR Pulse Rates OR Heartbeat OR Heartbeats OR Cardiac Chronotropy OR Cardiac Chronotropism OR Heart Rate Control OR Respiratory Rate OR Respiratory Rates OR Respiration Rate OR Respiration Rates OR Lung Mechanic OR Lung Mechanic OR Pulmonary Mechanic OR Pulmonary Mechanics OR Thoracoabdominal Mobility)

Total:

### SCIELO

Newborn AND Physical Therapy Modalities OR Respiratory Therapy AND Respiratory Mechanics OR Lung Volume Measurements OR Heart Rate OR Respiratory Rate

Total:

### COCHRANE CENTRAL

(Newborn OR Newborns OR Newborn Infant OR Newborn Infants OR Neonate OR Neonates) AND (Physical Therapy Modality OR Physical Therapy Modalities OR Physiotherapy (Techniques) OR Physiotherapies (Techniques) OR Physical Therapy

Techniques OR Physical Therapy Technique OR Group Physiotherapy OR Group Physiotherapies OR Physical Therapy OR Physical Therapies OR Physical Therapy Specialty OR Physiotherapy Specialty OR Respiratory Therapy OR Respiratory Therapies OR Chest Physical Therapy OR Conventional Chest Physical Therapy OR Chest Physiotherapy OR Physiotherapy Respiratory OR Physiotherapy OR Autogenic Drainage OR Expiratory Flow Increase Technique OR Prolonged Slow Expiratory Maneuver OR Technique of Re-educating Thoracic and Abdominal OR Chest Percussion OR Shaking OR Tapping) AND (Respiratory Mechanic OR Respiratory Mechanics OR Breathing Mechanics OR Breathing Mechanic OR Lung Volume Measurement OR Lung Volumes OR Lung Volume OR Lung Capacities OR Lung Capacity OR Sputum OR Sputums OR Induced Sputum OR Induced Sputums OR Pain OR Heart Rate OR Heart Rates OR Cardiac Rate OR Cardiac Rates OR Pulse Rate OR Pulse Rates OR Heartbeat OR Heartbeats OR Cardiac Chronotropy OR Cardiac Chronotropism OR Heart Rate Control OR Respiratory Rate OR Respiratory Rates OR Respiration Rate OR Respiration Rates OR Lung Mechanic OR Lung Mechanic OR Pulmonary Mechanic OR Pulmonary Mechanics OR Thoracoabdominal Mobility)

Total:

#### LILACS

Newborn AND Physical Therapy Modalities OR Physical Therapy Specialty AND Respiratory Mechanics

Total:

#### SCIENCE DIRECT

"Newborn Infant" AND "Physiotherapies" OR "Physical Therapy Modalities" AND "Breathing Mechanics" OR "Breathing Mechanic" OR "Lung Volume Measurement"

Total:

#### WEB OF SCIENCE

"Newborn Infant" AND "Physiotherapies" OR "Physical Therapy Modalities" AND "Breathing Mechanics" OR "Breathing Mechanic" OR "Lung Volume Measurement"

Total:
